# Supplementary material for: Global psychological assessment with the evaluation of life and sleep quality and sexual and cognitive function in a large number of patients with acromegaly: a cross-sectional study
Source: PubMed Central journal article supplement (PMC9782455; doi:10.1530/eje-22-0263), 2022-09-27
Supplement: supplementary_material.pdf [file supplementary_material.pdf]

Supplemental Table 1: Results of the BDI-II questionnaire

| <b>BDI-II</b>                            | <b>N=223</b> | <b>Score</b>     |
|------------------------------------------|--------------|------------------|
| <b>Depression scale</b>                  |              |                  |
| Mean (SD)                                | 65.9 (25.3)  | Normal score <85 |
| No depression                            | 68.2%        | score ≤ 85       |
| Mild depression                          | 9.9%         | 85-90            |
| Moderate depression                      | 4.5%         | 91-95            |
| Severe depression                        | 17.5%        | score >95        |
| <b>Somatic Affective scale</b>           |              |                  |
| Mean (SD)                                | 66.6 (24.3)  | Normal score <85 |
| No somatic-affective mood lowering       | 70%          | score ≤ 85       |
| Mild somatic-affective mood lowering     | 8.5%         | 85-90            |
| Moderate somatic-affective mood lowering | 6.3%         | 91-95            |
| Severe somatic-affective mood lowering   | 15.2%        | score >95        |
| <b>Cognitive scale</b>                   |              |                  |
| Mean (SD)                                | 71.7(21.2)   | Normal score <85 |
| No cognitive symptoms                    | 60.5%        | score ≤ 85       |
| Mild cognitive symptoms                  | 15.2%        | 85-90            |
| Moderate cognitive symptoms              | 6.7%         | 91-95            |
| Severe cognitive symptomatology          | 17.5%        | score >95        |

| <b>BDI-II by age range</b> | <b>&lt;45 years<br/>(N=42)</b> | <b>45-64<br/>years<br/>(N=125)</b> | <b>&gt;64 years<br/>(N=56)</b> | <b>P-value</b> |
|----------------------------|--------------------------------|------------------------------------|--------------------------------|----------------|
| <b>Depression scale</b>    |                                |                                    |                                |                |

| <b>BDI-II by age range</b>               | <b>&lt;45 years<br/>(N=42)</b> | <b>45-64<br/>years<br/>(N=125)</b> | <b>&gt;64 years<br/>(N=56)</b> | <b>P-value</b> |
|------------------------------------------|--------------------------------|------------------------------------|--------------------------------|----------------|
| <b>Depression scale</b>                  |                                |                                    |                                |                |
| Mean (SD)                                | 74.5 (21.2)                    | 64.3 (25.8)                        | 63.0 (26.1)                    | 0.047          |
| Mild depression                          | 7.1%                           | 9.6%                               | 12.5%                          |                |
| Moderate depression                      | 9.5%                           | 4.0%                               | 1.8%                           | 0.37           |
| Severe depression                        | 23.8%                          | 17.6%                              | 12.5%                          |                |
| <b>Somatic Affective scale</b>           |                                |                                    |                                |                |
| Mean (SD)                                | 75.2 (19.8)                    | 65.9 (24.5)                        | 61.7 (25.6)                    | 0.021          |
| Mild somatic-affective mood lowering     | 9.5%                           | 8.0%                               | 8.9%                           |                |
| Moderate somatic-affective mood lowering | 7.1%                           | 7.2%                               | 3.6%                           | 0.81           |
| Severe somatic-affective mood lowering   | 21.4%                          | 14.4%                              | 12.5%                          |                |
| <b>Cognitive scale</b>                   |                                |                                    |                                |                |
| Mean (SD)                                | 77.0 (19.9)                    | 69.6 (21.5)                        | 72.4 (21.2)                    | 0.14           |
| Mild cognitive symptoms                  | 11.9%                          | 16.0%                              | 16.1%                          |                |
| Moderate cognitive symptoms              | 11.9%                          | 4.9%                               | 7.1%                           | 0.72           |
| Severe cognitive symptoms                | 21.4%                          | 16.0%                              | 17.9%                          |                |

| <b>BDI-II by gender</b>                  | <b>Men<br/>(N=94)</b> | <b>Women<br/>(N=129)</b> | <b>P-value</b> |
|------------------------------------------|-----------------------|--------------------------|----------------|
| <b>Depression scale</b>                  |                       |                          |                |
| Mean (SD)                                | 67.1 (26.2)           | 65.1(24.7)               | 0.57           |
| Mild depression                          | 11.7%                 | 8.5%                     |                |
| Moderate depression                      | 6.4%                  | 3.1%                     | 0.42           |
| Severe depression                        | 19.1%                 | 16.3%                    |                |
| <b>Somatic Affective scale</b>           |                       |                          |                |
| Mean (SD)                                | 65.8 (25.6)           | 65.0 (23.2)              | 0.26           |
| Mild somatic-affective mood lowering     | 10.6%                 | 7%                       | 0.4            |
| Moderate somatic-affective mood lowering | 7.4%                  | 5.4%                     |                |
| Severe somatic-affective mood lowering   | 18.1%                 | 13.2%                    |                |
| <b>Cognitive scale</b>                   |                       |                          |                |

| <b>BDI-II by gender</b>     | <b>Men<br/>(N=94)</b> | <b>Women<br/>(N=129)</b> | <b>P-value</b> |
|-----------------------------|-----------------------|--------------------------|----------------|
| Mean (SD)                   | 73.5(19.5)            | 70.4 (22.4)              | 0.27           |
| Mild cognitive symptoms     | 20.2%                 | 11.6%                    | 0.098          |
| Moderate cognitive symptoms | 9.6%                  | 4.6%                     |                |
| Severe cognitive symptoms   | 13.8%                 | 20.2%                    |                |

| <b>BDI-II by disease duration</b>        | <b>&lt;2 year<br/>(N=25)</b> | <b>2-5 year<br/>(N=55)</b> | <b>5-10 year<br/>(N=59)</b> | <b>&gt;10 year<br/>(N=52)</b> | <b>P-value</b> |
|------------------------------------------|------------------------------|----------------------------|-----------------------------|-------------------------------|----------------|
| <b>Depression scale</b>                  |                              |                            |                             |                               |                |
| Mean (SD)                                | 72.0 (27.5)                  | 68.9 (23.8)                | 59.7 (26.9)                 | 66.7 (24.9)                   | 0.13           |
| Mild depression                          | 16.0%                        | 7.3%                       | 6.8%                        | 11.5%                         | 0.39           |
| Moderate depression                      | 4%                           | 9.1%                       | 1.7%                        | 5.8%                          |                |
| Severe depression                        | 28.0%                        | 20.0%                      | 13.6%                       | 15.4%                         |                |
| <b>Somatic Affective scale</b>           |                              |                            |                             |                               |                |
| Mean (SD)                                | 72.5 (28.1)                  | 69.5 (22.6)                | 61 (26.5)                   | 66 (22.8)                     | 0.16           |
| Mild somatic-affective mood lowering     | 8.0%                         | 5.4%                       | 13.6%                       | 5.8%                          | 0.31           |
| Moderate somatic-affective mood lowering | 16.0%                        | 7.3%                       | 3.4%                        | 5.8%                          |                |
| Severe somatic-affective mood lowering   | 24.0%                        | 18.2%                      | 11.9%                       | 13.5%                         |                |
| <b>Cognitive scale</b>                   |                              |                            |                             |                               |                |
| Mean (SD)                                | 75.3 (21.6)                  | 73.9 (20.5)                | 66.2 (22.9)                 | 75.3 (20.2)                   | 0.089          |
| Mild cognitive symptoms                  | 24.0%                        | 16.4%                      | 10.2%                       | 19.2%                         | 0.6            |
| Moderate cognitive symptoms              | 12.0%                        | 3.6%                       | 5.1%                        | 7.7%                          |                |
| Severe cognitive symptoms                | 16.0%                        | 21.8%                      | 15.3%                       | 19.2%                         |                |

| <b>BDI-II by disease control</b> | <b>Disease control<br/>(N=156)</b> | <b>No disease control<br/>(N=67)</b> | <b>P-value</b> |
|----------------------------------|------------------------------------|--------------------------------------|----------------|
|----------------------------------|------------------------------------|--------------------------------------|----------------|

| <b>BDI-II by disease control</b>         | <b>Disease control (N=156)</b> | <b>No disease control (N=67)</b> | <b>P-value</b> |
|------------------------------------------|--------------------------------|----------------------------------|----------------|
| <b>Depression scale</b>                  |                                |                                  |                |
| Mean (SD)                                | 65.2 (25.2)                    | 67.6 (25.6)                      | 0.52           |
| Mild depression                          | 9%                             | 11.9%                            |                |
| Moderate depression                      | 5.1%                           | 3%                               | 0.76           |
| Severe depression                        | 16.7%                          | 19.4%                            |                |
| <b>Somatic Affective scale</b>           |                                |                                  |                |
| Mean (SD)                                | 65.8 (24.1)                    | 68.4 (24.8)                      | 0.46           |
| Mild somatic-affective mood lowering     | 8.3%                           | 9%                               | 0.037          |
| Moderate somatic-affective mood lowering | 3.2%                           | 13.4%                            |                |
| Severe somatic-affective mood lowering   | 16.0%                          | 13.4%                            |                |
| <b>Cognitive scale</b>                   |                                |                                  |                |
| Mean (SD)                                | 71.2 (21.3)                    | 72.7 (21)                        | 0.63           |
| Mild cognitive symptoms                  | 15.4%                          | 14.9%                            |                |
| Moderate cognitive symptoms              | 7.0%                           | 6%                               | 0.96           |
| Severe cognitive symptoms                | 16.7%                          | 19.4%                            |                |

| <b>BDI-II by IGF-I categories</b>        | <b>&lt;=1 (N=156)</b> | <b>1.0-1.3 (N=32)</b> | <b>&gt;1.3 (N=35)</b> | <b>P-value</b> |
|------------------------------------------|-----------------------|-----------------------|-----------------------|----------------|
| <b>Depression scale</b>                  |                       |                       |                       |                |
| Mean (SD)                                | 65.2 (25.2)           | 71.5 (25.5)           | 64.0 (25.5)           | 0.4            |
| Mild depression                          | 9%                    | 12.5%                 | 11.4%                 |                |
| Moderate depression                      | 5.1%                  | 0.0%                  | 5.7%                  |                |
| Severe depression                        | 16.7%                 | 25.0%                 | 14.3%                 |                |
| <b>Somatic Affective scale</b>           |                       |                       |                       |                |
| Mean (SD)                                | 65.8 (24.1)           | 71.3 (24.3)           | 65.8 (25.2)           | 0.4            |
| Mild somatic-affective mood lowering     | 8.3%                  | 12.5%                 | 5.7%                  |                |
| Moderate somatic-affective mood lowering | 3.2%                  | 15.6%                 | 11.4%                 |                |
| Severe somatic-affective mood lowering   | 16.0%                 | 12.5%                 | 14.3%                 |                |
| <b>Cognitive scale</b>                   |                       |                       |                       |                |
| Mean (SD)                                | 71.2 (21.3)           | 76.8 (20.1)           | 69 (21.4)             | 0.4            |

| <b>BDI-II by IGF-I categories</b> | <b>&lt;=1<br/>(N=156)</b> | <b>1.0-1.3<br/>(N=32)</b> | <b>&gt;1.3<br/>(N=35)</b> | <b>P-value</b> |
|-----------------------------------|---------------------------|---------------------------|---------------------------|----------------|
| Mild cognitive symptoms           | 15.4%                     | 15.6%                     | 14.3%                     |                |
| Moderate cognitive symptoms       | 7%                        | 3.1%                      | 8.6%                      |                |
| Severe cognitive symptoms         | 16.7%                     | 28.1%                     | 11.4%                     |                |

Supplemental Table 2: Results of the the State-Trait Anxiety Inventory Form Y1 and Y2

| <b>S.T.A.I. Y1 and Y2</b> | <b>N=223</b> | <b>Score</b>     |
|---------------------------|--------------|------------------|
| <b>S.T.A.I. Y1</b>        |              |                  |
| Mean (SD)                 | 48.7 (11.8)  | normal score ≤40 |
| No state anxiety          | 17.7%        | Score ≤40        |
| Mild state anxiety        | 42.7%        | Score 40-50      |
| Moderate state anxiety    | 25%          | Score 51-60      |
| Severe state anxiety      | 14.6%        | Score >60        |
| <b>S.T.A.I. Y2</b>        |              |                  |
| Mean (SD)                 | 51.6 (12.8)  | normal score ≤40 |
| No trait anxiety          | 19.6%        | Score ≤40        |
| Mild trait anxiety        | 32.3%        | Score 40-50      |
| Moderate trait anxiety    | 26.5%        | Score 51-60      |
| Severe trait anxiety      | 21.5%        | Score >60        |

| <b>S.T.A.I. Y1 and Y2 by age class</b> | <b>&lt;45 years<br/>(N=42)</b> | <b>45-64 years<br/>(N=125)</b> | <b>&gt;64 years<br/>(N=56)</b> | <b>P-value</b> |
|----------------------------------------|--------------------------------|--------------------------------|--------------------------------|----------------|
| <b>S.T.A.I. Y1</b>                     |                                |                                |                                |                |
| Mean (SD)                              | 54.9 (11.9)                    | 47.5 (11.4)                    | 46.6 (11.4)                    | < 0.001        |
| Absent/Mild state anxiety              | 21.4%                          | 39.2%                          | 41.1%                          | 0.033          |
| Moderate state anxiety                 | 23.8%                          | 32.0%                          | 28.6%                          |                |
| Severe state anxiety                   | 54.8%                          | 28.8%                          | 30.4%                          |                |
| <b>S.T.A.I. Y2</b>                     |                                |                                |                                |                |
| Mean (SD)                              | 56.8 (12.3)                    | 50.6 (12.1)                    | 49.9 (13.9)                    | 0.013          |
| Absent/Mild trait anxiety              | 21.4%                          | 36.0%                          | 28.6%                          | 0.095          |
| Moderate trait anxiety                 | 23.8%                          | 32.8%                          | 30.4%                          |                |
| Severe trait anxiety                   | 54.8%                          | 31.2%                          | 41.1%                          |                |

| <b>S.T.A.I. Y1 and Y2 by gender</b> | <b>Male<br/>(N=94)</b> | <b>Female<br/>(N=129)</b> | <b>P-value</b> |
|-------------------------------------|------------------------|---------------------------|----------------|
| <b>S.T.A.I. Y1</b>                  |                        |                           |                |

|                           |             |             |      |
|---------------------------|-------------|-------------|------|
| Mean (SD)                 | 48.9 (14.1) | 48.5 (9.9)  | 0.8  |
| Absent/Mild state anxiety | 31.9%       | 39.5%       |      |
| Moderate state anxiety    | 28.7%       | 30.2%       | 0.33 |
| Severe state anxiety      | 39.4%       | 30.2%       |      |
| <b>S.T.A.I. Y2</b>        |             |             |      |
| Mean (SD)                 | 52.5 (14.8) | 50.9 (11.2) | 0.37 |
| Absent/Mild trait anxiety | 31.9%       | 31.0%       |      |
| Moderate trait anxiety    | 28.7%       | 31.8%       | 0.88 |
| Severe trait anxiety      | 39.4%       | 37.2%       |      |

| <b>S.T.A.I. Y1 and Y2 by disease duration</b> | <b>&lt;2 years<br/>(N=25)</b> | <b>2-5 years<br/>(N=55)</b> | <b>5-10<br/>years<br/>(N=59)</b> | <b>&gt; 10<br/>years<br/>(N=52)</b> | <b>P-value</b> |
|-----------------------------------------------|-------------------------------|-----------------------------|----------------------------------|-------------------------------------|----------------|
| <b>S.T.A.I. Y1</b>                            |                               |                             |                                  |                                     |                |
| Mean (SD)                                     | 48.8 (9.8)                    | 50.6 (10.7)                 | 46.9 (12.0)                      | 46.9 (14.0)                         | 0.31           |
| Absent/Mild state anxiety                     | 32.0%                         | 34.5%                       | 39.0%                            | 46.2%                               |                |
| Moderate state anxiety                        | 32.0%                         | 30.9%                       | 35.6%                            | 21.2%                               | 0.63           |
| Severe state anxiety                          | 36.0%                         | 34.5%                       | 25.4%                            | 32.7%                               |                |
| <b>S.T.A.I. Y2</b>                            |                               |                             |                                  |                                     |                |
| Mean (SD)                                     | 53.5 (11.9)                   | 52.6 (10.2)                 | 50.4<br>(13.1)                   | 53.4<br>(12.7)                      | 0.53           |
| Absent/Mild trait anxiety                     | 24.0%                         | 25.5%                       | 28.8%                            | 34.6%                               |                |
| Moderate trait anxiety                        | 28.0%                         | 38.2%                       | 40.7%                            | 23.1%                               | 0.42           |
| Severe trait anxiety                          | 48.0%                         | 36.4%                       | 30.5%                            | 42.3%                               |                |

| <b>S.T.A.I. Y1 and Y2 by disease control</b> | <b>Disease<br/>control<br/>(N=156)</b> | <b>No disease<br/>control<br/>(N=67)</b> | <b>P-value</b> |
|----------------------------------------------|----------------------------------------|------------------------------------------|----------------|
| <b>S.T.A.I. Y1</b>                           |                                        |                                          |                |
| Mean (SD)                                    | 49.4 (11.3)                            | 46.9 (12.9)                              | 0.18           |

| <b>S.T.A.I. Y1 and Y2 by disease control</b> | <b>Disease control (N=156)</b> | <b>No disease control (N=67)</b> | <b>P-value</b> |
|----------------------------------------------|--------------------------------|----------------------------------|----------------|
| Absent/Mild state anxiety                    | 34%                            | 41.8%                            | 0.43           |
| Moderate state anxiety                       | 29.5%                          | 29.9%                            |                |
| Severe state anxiety                         | 36.5%                          | 28.4%                            |                |
| <b>S.T.A.I. Y2</b>                           |                                |                                  |                |
| Mean (SD)                                    | 51.3 (13.0)                    | 52.3 (12.5)                      | 0.62           |
| Absent/Mild trait anxiety                    | 29.5%                          | 35.8%                            | 0.12           |
| Moderate trait anxiety                       | 34.6%                          | 20.9%                            |                |
| Severe trait anxiety                         | 35.9%                          | 43.3%                            |                |

| <b>S.T.A.I. Y1 and Y2 by IGF-I categories</b> | <b>≤1 (N=156)</b> | <b>1.0-1.3 (N=32)</b> | <b>&gt;1.3 (N=35)</b> | <b>P-value</b> |
|-----------------------------------------------|-------------------|-----------------------|-----------------------|----------------|
| <b>S.T.A.I. Y1</b>                            |                   |                       |                       |                |
| Mean (SD)                                     | 49.4 (11.3)       | 47.2 (12.2)           | 46.7 (13.7)           | 0.35           |
| Absent/Mild state anxiety                     | 34%               | 31.3%                 | 51.4%                 | 0.29           |
| Moderate state anxiety                        | 29.5%             | 37.5%                 | 22.9%                 |                |
| Severe state anxiety                          | 36.5%             | 31.3%                 | 25.7%                 |                |
| <b>S.T.A.I. Y2</b>                            |                   |                       |                       |                |
| Mean (SD)                                     | 51.3 (13.0)       | 52.4 (11.4)           | 52.1 (13.5)           | 0.88           |
| Absent/Mild trait anxiety                     | 29.5%             | 28.1%                 | 42.9%                 | 0.19           |
| Moderate trait anxiety                        | 34.6%             | 21.9%                 | 20.0%                 |                |
| Severe trait anxiety                          | 35.9%             | 50.0%                 | 37.1%                 |                |



Supplemental Table 3: Results of the Body Uneasiness Test A and B

| <b>BUT A – BUT B</b>                                | <b>N=223</b> | <b>Score</b>            |
|-----------------------------------------------------|--------------|-------------------------|
| <b>BUT A GSI (Global Severity Index)</b>            |              |                         |
| Mean (SD)                                           | 0.8 (0.9)    | normal value $\leq 1.2$ |
| No global concern                                   | 78.7%        | $\leq 1.2$              |
| Global concern                                      | 21.3%        | $> 1.2$                 |
| <b>Weight_Phobia</b>                                |              |                         |
| Mean (SD)                                           | 1.0 (1.1)    | normal value $< 1$      |
| No Concern                                          | 67.4%        | $< 1$                   |
| Concern                                             | 32.6%        | $> 1$                   |
| <b>Body Image Concerns</b>                          |              |                         |
| Mean (SD)                                           | 1.0 (1.0)    | normal value $< 1$      |
| No Concern                                          | 62.9%        | $< 1$                   |
| Concern                                             | 37.1%        | $> 1$                   |
| <b>Avoidance</b>                                    |              |                         |
| Mean (SD)                                           | 0.5 (0.8)    | normal value $< 1$      |
| No Concern                                          | 85.1%        | $< 1$                   |
| Concern                                             | 14.9%        | $> 1$                   |
| <b>Compulsive_Self_Monitoring</b>                   |              |                         |
| Mean (SD)                                           | 0.7 (0.8)    | normal value $< 1$      |
| No Concern                                          | 71.9%        | $< 1$                   |
| Concern                                             | 28.1%        | $> 1$                   |
| <b>Depersonalization</b>                            |              |                         |
| Mean (SD)                                           | 0.4 (0.9)    | normal value $< 1$      |
| No Concern                                          | 86%          | $< 1$                   |
| Concern                                             | 14%          | $> 1$                   |
| <b>BUT B Positive Symptom Distress Index (PSDI)</b> |              |                         |
| Mean (SD)                                           | 2.1 (1.2)    | normal value $< 1$      |
| <b>BUT B 1 Mouth</b>                                |              |                         |
| Mean (SD)                                           | 0.9 (1.0)    | normal value $< 1$      |
| <b>BUT B 2 Face</b>                                 |              |                         |
| Mean (SD)                                           | 1.2 (0.9)    | normal value $< 1$      |
| <b>BUT B 3 Things</b>                               |              |                         |

|                          |           |                 |
|--------------------------|-----------|-----------------|
| Mean (SD)                | 0.8 (1.2) | normal value <1 |
| <b>BUT B 4 Legs</b>      |           |                 |
| Mean (SD)                | 1.0 (1.1) | normal value <1 |
| <b>BUT B 5 Arms</b>      |           |                 |
| Mean (SD)                | 0.5 (0.9) | normal value <1 |
| <b>BUT B 6 Moustache</b> |           |                 |
| Mean (SD)                | 0.5 (0.9) | normal value <1 |
| <b>BUT B 7 Skin</b>      |           |                 |
| Mean (SD)                | 0.7 (1.2) | normal value <1 |
| <b>BUT B 8 Blushing</b>  |           |                 |
| Mean (SD)                | 0.6 (0.9) | normal value <1 |

| <b>BUT A – BUT B by age class</b>        | <b>&lt;45 years<br/>(N=42)</b> | <b>45-64 years<br/>(N=125)</b> | <b>&gt;64 years<br/>(N=56)</b> | <b>P-value</b> |
|------------------------------------------|--------------------------------|--------------------------------|--------------------------------|----------------|
| <b>BUT A GSI (Global Severity Index)</b> |                                |                                |                                |                |
| Mean (SD)                                | 1.4 (1.0)                      | 0.8 (0.8)                      | 0.4 (0.4)                      | < 0.001        |
| No global concern                        | 52.4%                          | 81.5%                          | 92.7%                          | < 0.001        |
| Global concern                           | 47.6%                          | 18.5%                          | 7.3%                           |                |
| <b>Weight_Phobia (WP)</b>                |                                |                                |                                |                |
| Mean (SD)                                | 1.7 (1.3)                      | 1.0 (1.1)                      | 0.4 (0.6)                      | < 0.001        |
| No Concern                               | 38.1%                          | 67.7%                          | 89.1%                          | < 0.001        |
| Concern                                  | 61.9%                          | 32.3%                          | 10.9%                          |                |
| <b>Body Image Concerns (BIC)</b>         |                                |                                |                                |                |
| Mean (SD)                                | 1.8 (1.2)                      | 1.0 (1.0)                      | 0.6 (0.6)                      | < 0.001        |
| No Concern                               | 35.7%                          | 63.7%                          | 81.8%                          | < 0.001        |
| Concern                                  | 64.3%                          | 36.3%                          | 18.2%                          |                |
| <b>Avoidance</b>                         |                                |                                |                                |                |
| Mean (SD)                                | 0.8 (0.9)                      | 0.4 (0.7)                      | 0.3 (0.5)                      | 0.002          |
| No Concern                               | 76.2%                          | 87.9%                          | 85.5%                          | 0.18           |
| Concern                                  | 23.8%                          | 12.1%                          | 14.5%                          |                |
| <b>Compulsive_Self_Monitoring</b>        |                                |                                |                                |                |
| Mean (SD)                                | 1.3 (1.0)                      | 0.7 (0.8)                      | 0.3 (0.4)                      | <0.001         |
| No Concern                               | 45.2%                          | 72.6%                          | 90.9%                          | < 0.001        |

|                                                     |           |            |            |         |
|-----------------------------------------------------|-----------|------------|------------|---------|
| Concern                                             | 54.8%     | 27.4%      | 9.1%       |         |
| <b>Depersonalization</b>                            |           |            |            |         |
| Mean (SD)                                           | 0.9 (1.1) | 0.4 (0.9)  | 0.1 (0.3)  | <0.001  |
| No Concern                                          | 66.7%     | 87.9%      | 96.4%      |         |
| Concern                                             | 33.3%     | 12.1%      | 3.6%       | <0.001  |
| <b>BUT B Positive Symptom Distress Index (PSDI)</b> |           |            |            |         |
| Mean (SD)                                           | 2.6 (1.2) | 2.1 (1.2)  | 1.9 (1.1)  | 0.006   |
| <b>BUT B 1 Mouth</b>                                |           |            |            |         |
| Mean (SD)                                           | 1.3 (1.3) | 0.8 (1.0)  | 0.6 (0.6)  | 0.003   |
| <b>BUT B 2 Face</b>                                 |           |            |            |         |
| Mean (SD)                                           | 1.0 (1.3) | 0.63 (0.8) | 0.33 (0.5) | < 0.001 |
| <b>BUT B 3 Thighs</b>                               |           |            |            |         |
| Mean (SD)                                           | 1.4 (1.5) | 0.8 (1.1)  | 0.4 (0.7)  | < 0.001 |
| <b>BUT B 4 Legs</b>                                 |           |            |            |         |
| Mean (SD)                                           | 1.5 (1.2) | 1.0 (1.1)  | 0.6 (0.7)  | < 0.001 |
| <b>BUT B 5 Arms</b>                                 |           |            |            |         |
| Mean (SD)                                           | 1.0 (1.2) | 0.5 (0.9)  | 0.2 (0.4)  | < 0.001 |
| <b>BUT B 6 Moustache</b>                            |           |            |            |         |
| Mean (SD)                                           | 0.8 (1.1) | 0.4 (0.9)  | 0.3 (0.7)  | 0.013   |
| <b>BUT B 7 Skin</b>                                 |           |            |            |         |
| Mean (SD)                                           | 1.1 (1.5) | 0.8 (1.2)  | 0.5 (0.9)  | 0.046   |
| <b>BUT B 8 Blushing</b>                             |           |            |            |         |
| Mean (SD)                                           | 1.1 (1.1) | 0.6 (0.9)  | 0.4 (0.6)  | < 0.001 |

| <b>BUT A – BUT B by gender</b>           | <b>Male<br/>(N=94)</b> | <b>Female<br/>(N=129)</b> | <b>P-value</b> |
|------------------------------------------|------------------------|---------------------------|----------------|
| <b>BUT A GSI (Global Severity Index)</b> |                        |                           |                |
| Mean (SD)                                | 0.6 (0.6)              | 0.9 (1.0)                 | 0.004          |
| No global concern                        | 83.9%                  | 75.0%                     |                |
| Global concern                           | 16.1%                  | 25.0%                     | 0.15           |
| <b>Weight_Phobia</b>                     |                        |                           |                |
| Mean (SD)                                | 0.7 (0.8)              | 1.2 (1.2)                 | <0.001         |
| No Concern                               | 72.0%                  | 64.1%                     | 0.27           |

|                                                     |           |            |         |
|-----------------------------------------------------|-----------|------------|---------|
| Concern                                             | 28.0%     | 35.9%      |         |
| <b>Body Image Concerns</b>                          |           |            |         |
| Mean (SD)                                           | 0.8 (0.9) | 1.2 (1.1)  | 0.006   |
| No Concern                                          | 68.8%     | 58.6%      |         |
| Concern                                             | 31.2%     | 41.4%      | 0.16    |
| <b>Avoidance</b>                                    |           |            |         |
| Mean (SD)                                           | 0.4 (0.6) | 0.6 (0.8)  | 0.038   |
| No Concern                                          | 87.1%     | 83.6%      |         |
| Concern                                             | 12.9%     | 16.4%      | 0.6     |
| <b>Compulsive_Self_Monitoring</b>                   |           |            |         |
| Mean (SD)                                           | 0.6 (0.7) | 0.9 (0.9)  | 0.008   |
| No Concern                                          | 76.3%     | 68.7%      |         |
| Concern                                             | 23.7%     | 31.3%      | 0.28    |
| <b>Depersonalization</b>                            |           |            |         |
| Mean (SD)                                           | 0.3 (0.6) | 0.95 (1.0) | 0.024   |
| No Concern                                          | 90.3%     | 82.8%      |         |
| Concern                                             | 9.7%      | 17.2%      | 0.16    |
| <b>BUT B Positive Symptom Distress Index (PSDI)</b> |           |            |         |
| Mean (SD)                                           | 1.9 (1.2) | 2.4 (1.1)  | < 0.001 |
| <b>BUT B 1 Mouth</b>                                |           |            |         |
| Mean (SD)                                           | 0.7 (0.9) | 1.0 (1.0)  | 0.059   |
| <b>BUT B 2 Face</b>                                 |           |            |         |
| Mean (SD)                                           | 0.6 (0.9) | 0.7 (0.9)  | 0.63    |
| <b>BUT B 3 Thighs</b>                               |           |            |         |
| Mean (SD)                                           | 0.4 (0.8) | 1.1 (1.3)  | < 0.001 |
| <b>BUT B 4 Legs</b>                                 |           |            |         |
| Mean (SD)                                           | 0.6 (0.8) | 1.3 (1.1)  | < 0.001 |
| <b>BUT B 5 Harms</b>                                |           |            |         |
| Mean (SD)                                           | 0.3 (0.7) | 0.7 (1.0)  | 0.002   |
| <b>BUT B 6 Moustache</b>                            |           |            |         |
| Mean (SD)                                           | 0.3 (0.7) | 0.6 (1.0)  | 0.011   |
| <b>BUT B 7 Skin</b>                                 |           |            |         |
| Mean (SD)                                           | 0.6 (1.1) | 0.9 (1.2)  | 0.08    |

| <b>BUT B 8 Blushing</b>                             |                              |                            |                             |                               |                |
|-----------------------------------------------------|------------------------------|----------------------------|-----------------------------|-------------------------------|----------------|
| Mean (SD)                                           |                              | 0.4 (0.7)                  | 0.8 (1.0)                   |                               | < 0.001        |
| <b>BUT A – BUT B by disease duration</b>            |                              |                            |                             |                               |                |
|                                                     | <b>&lt;2 year<br/>(N=25)</b> | <b>2-5 year<br/>(N=55)</b> | <b>5-10 year<br/>(N=59)</b> | <b>&gt;10 year<br/>(N=52)</b> | <b>P-value</b> |
| <b>BUT A GSI (Global Severity Index)</b>            |                              |                            |                             |                               |                |
| Mean (SD)                                           | 1.1 (1.0)                    | 0.8 (0.8)                  | 0.6 (0.7)                   | 0.8 (1.0)                     | 0.17           |
| No global concern                                   | 64.0%                        | 76.4%                      | 87.7%                       | 82.7%                         | 0.079          |
| Global concern                                      | 36.0%                        | 23.6%                      | 12.3%                       | 17.3%                         |                |
| <b>Weight_Phobia</b>                                |                              |                            |                             |                               |                |
| Mean (SD)                                           | 1.4 (1.4)                    | 1.0 (1.1)                  | 0.8 (0.8)                   | 0.6 (0.9)                     | 0.095          |
| No Concern                                          | 56.0%                        | 63.6%                      | 70.2%                       | 75.0%                         | 0.33           |
| Concern                                             | 44.0%                        | 36.4%                      | 29.8%                       | 25.0%                         |                |
| <b>Body Image Concerns</b>                          |                              |                            |                             |                               |                |
| Mean (SD)                                           | 1.3 (1.2)                    | 1.1 (1.0)                  | 0.9 (0.9)                   | 1.0 (1.1)                     | 0.35           |
| No Concern                                          | 56.0%                        | 54.5%                      | 71.9%                       | 65.4%                         | 0.23           |
| Concern                                             | 44.0%                        | 45.5%                      | 28.1%                       | 34.6%                         |                |
| <b>Avoidance</b>                                    |                              |                            |                             |                               |                |
| Mean (SD)                                           | 0.6 (0.8)                    | 0.4 (0.7)                  | 0.9 (0.6)                   | 0.5 (0.9)                     | 0.58           |
| No Concern                                          | 80.0%                        | 83.6%                      | 87.7%                       | 86.5%                         | 0.8            |
| Concern                                             | 20.0%                        | 16.4%                      | 12.3%                       | 13.5%                         |                |
| <b>Compulsive_Self_Monitoring</b>                   |                              |                            |                             |                               |                |
| Mean (SD)                                           | 0.6 (0.9)                    | 0.6 (0.9)                  | 0.6 (0.9)                   | 0.6 (0.9)                     | 0.29           |
| No Concern                                          | 52.0%                        | 72.7%                      | 82.5%                       | 71.2%                         | 0.043          |
| Concern                                             | 48.0%                        | 27.3%                      | 17.5%                       | 28.8%                         |                |
| <b>Depersonalization</b>                            |                              |                            |                             |                               |                |
| Mean (SD)                                           | 0.6 (1.0)                    | 0.4 (0.7)                  | 0.3 (0.8)                   | 0.5 (1.1)                     | 0.5            |
| No Concern                                          | 76.0%                        | 87.3%                      | 91.2%                       | 84.6%                         | 0.31           |
| Concern                                             | 24.0%                        | 12.7%                      | 8.8%                        | 15.4%                         |                |
| <b>BUT B Positive Symptom Distress Index (PSDI)</b> |                              |                            |                             |                               |                |
| Mean (SD)                                           | 2.22 (1.38)                  | 2.28 (1.19)                | 2.08 (1.24)                 | 2.15 (1.29)                   | 0.86           |
| <b>BUT B 1 Mouth</b>                                |                              |                            |                             |                               |                |

|                          |           |           |            |           |      |
|--------------------------|-----------|-----------|------------|-----------|------|
| Mean (SD)                | 0.7 (1.0) | 0.7 (0.6) | 1.0 (1.1)  | 1.0 (1.2) | 0.32 |
| <b>BUT B 2 Face</b>      |           |           |            |           |      |
| Mean (SD)                | 0.6 (0.9) | 0.6 (0.7) | 0.5 (0.9)  | 0.8 (1.0) | 0.48 |
| <b>BUT B 3 Things</b>    |           |           |            |           |      |
| Mean (SD)                | 0.7 (1.2) | 0.7 (1.1) | 0.8 (1.02) | 0.9 (1.3) | 0.88 |
| <b>BUT B 4 Legs</b>      |           |           |            |           |      |
| Mean (SD)                | 1.1 (1.1) | 0.9 (1.0) | 0.9 (1.0)  | 1.0 (1.2) | 0.81 |
| <b>BUT B 5 Arms</b>      |           |           |            |           |      |
| Mean (SD)                | 0.7 (1.0) | 0.5 (0.9) | 0.5 (0.9)  | 0.5 (0.9) | 0.67 |
| <b>BUT B 6 Moustache</b> |           |           |            |           |      |
| Mean (SD)                | 0.3 (0.7) | 0.5 (0.8) | 0.5 (1.2)  | 0.4 (0.8) | 0.72 |
| <b>BUT B 7 Skin</b>      |           |           |            |           |      |
| Mean (SD)                | 0.9 (1.3) | 0.7 (1.2) | 0.7 (1.01) | 0.6 (1.1) | 0.74 |
| <b>BUT B 8 Blushing</b>  |           |           |            |           |      |
| Mean (SD)                | 0.6 (0.7) | 0.5 (0.6) | 0.7 (1.0)  | 0.7 (1.0) | 0.59 |

| <b>BUT A – BUT B by disease control</b>  | <b>Disease control (N=156)</b> | <b>No disease control (N=67)</b> | <b>P-value</b> |
|------------------------------------------|--------------------------------|----------------------------------|----------------|
| <b>BUT A GSI (Global Severity Index)</b> |                                |                                  |                |
| Mean (SD)                                | 0.8 (0.9)                      | 0.8 (0.8)                        | 0.73           |
| No global concern                        | 79.9%                          | 76.1%                            | 0.65           |
| Global concern                           | 20.1%                          | 23.9%                            |                |
| <b>Weight_Phobia</b>                     |                                |                                  |                |
| Mean (SD)                                | 1.0(1.3)                       | 1.0 (1.1)                        | 0.58           |
| No Concern                               | 69.5%                          | 62.7%                            | 0.4            |
| Concern                                  | 30.5%                          | 37.3%                            |                |
| <b>Body Image Concerns</b>               |                                |                                  |                |
| Mean (SD)                                | 1.0 (1.1)                      | 1.0 (1.0)                        | 0.68           |
| No Concern                               | 64.9%                          | 58.2%                            | 0.42           |
| Concern                                  | 35.1%                          | 41.8%                            |                |
| <b>Avoidance</b>                         |                                |                                  |                |
| Mean (SD)                                | 0.5 (1.0)                      | 0.4 (0.6)                        | 0.17           |

|                                                     |            |            |      |
|-----------------------------------------------------|------------|------------|------|
| No Concern                                          | 83.8%      | 88.1%      | 0.54 |
| Concern                                             | 16.2%      | 11.9%      |      |
| <b>Compulsive_Self_Monitoring</b>                   |            |            |      |
| Mean (SD)                                           | 0.7 (0.8)  | 0.8 (0.9)  | 0.26 |
| No Concern                                          | 73.4%      | 68.7%      | 0.58 |
| Concern                                             | 26.6%      | 31.3%      |      |
| <b>Depersonalization</b>                            |            |            |      |
| Mean (SD)                                           | 0.4 (0.9)  | 0.5 (0.8)  | 0.7  |
| No Concern                                          | 87.0%      | 83.6%      | 0.64 |
| Concern                                             | 13.0%      | 16.4%      |      |
| <b>BUT B Positive Symptom Distress Index (PSDI)</b> |            |            |      |
| Mean (SD)                                           | 2.07 (1.2) | 2.3(1.2)   | 0.28 |
| <b>BUT B 1 Mouth</b>                                |            |            |      |
| Mean (SD)                                           | 0.8 (1.0)  | 0.9 (1.0)  | 0.46 |
| <b>BUT B 2 Face</b>                                 |            |            |      |
| Mean (SD)                                           | 0.6 (0.9)  | 0.7 (0.9)  | 0.46 |
| <b>BUT B 3 Thighs</b>                               |            |            |      |
| Mean (SD)                                           | 0.8(1.2)   | 0.9 (1.1)  | 0.35 |
| <b>BUT B 4 Legs</b>                                 |            |            |      |
| Mean (SD)                                           | 0.9 (1.1)  | 1.1 (1.1)  | 0.39 |
| <b>BUT B 5 Arms</b>                                 |            |            |      |
| Mean (SD)                                           | 0.6 (1.0)  | 0.6 (0.7)  | 0.41 |
| <b>BUT B 6 Moustache</b>                            |            |            |      |
| Mean (SD)                                           | 0.4 (0.9)  | 0.5 (0.78) | 0.83 |
| <b>BUT B 7 Skin</b>                                 |            |            |      |
| Mean (SD)                                           | 0.7 (1.2)  | 0.8 (1.2)  | 0.76 |
| <b>BUT B 8 Blushing</b>                             |            |            |      |
| Mean (SD)                                           | 0.6 (0.9)  | 0.68 (0.9) | 0.21 |

| <b>BUT A – BUT B by IGF-I class</b>                 | <b>&lt;=1<br/>(N=156)</b> | <b>1.0-1.3<br/>(N=32)</b> | <b>&gt;1.3<br/>(N=35)</b> | <b>P-value</b> |
|-----------------------------------------------------|---------------------------|---------------------------|---------------------------|----------------|
| <b>BUT A GSI (Global Severity Index)</b>            |                           |                           |                           |                |
| Mean (SD)                                           | 0.8 (0.9)                 | 0.7 (0.8)                 | 0.9 (0.8)                 | 0.8            |
| No global concern                                   | 79.9%                     | 81.2%                     | 71.4%                     | 0.51           |
| Global concern                                      | 20.1%                     | 18.8%                     | 28.6%                     |                |
| <b>Weight_Phobia</b>                                |                           |                           |                           |                |
| Mean (SD)                                           | 0.9 (1.1)                 | 1.0 (1.1)                 | 1.1 (1.1)                 | 0.84           |
| No Concern                                          | 69.5%                     | 62.5%                     | 62.9%                     | 0.61           |
| Concern                                             | 30.5%                     | 37.5%                     | 37.1%                     |                |
| <b>Body Image Concerns</b>                          |                           |                           |                           |                |
| Mean (SD)                                           | 1.0 (1.1)                 | 1.0 (0.9)                 | 1.2 (1.1)                 | 0.79           |
| No Concern                                          | 64.9%                     | 53.1%                     | 62.9%                     | 0.45           |
| Concern                                             | 35.1%                     | 46.9%                     | 37.1%                     |                |
| <b>Avoidance</b>                                    |                           |                           |                           |                |
| Mean (SD)                                           | 0.5 (0.8)                 | 0.4 (0.7)                 | 0.4 (0.5)                 | 0.45           |
| No Concern                                          | 83.8%                     | 90.6%                     | 85.7%                     | 0.61           |
| Concern                                             | 16.2%                     | 9.4%                      | 14.3%                     |                |
| <b>Compulsive_Self_Monitoring</b>                   |                           |                           |                           |                |
| Mean (SD)                                           | 0.7 (0.8)                 | 0.8 (0.9)                 | 0.9 (1.0)                 | 0.48           |
| No Concern                                          | 73.4%                     | 71.9%                     | 65.7%                     | 0.66           |
| Concern                                             | 26.6%                     | 28.1%                     | 34.3%                     |                |
| <b>Depersonalization</b>                            |                           |                           |                           |                |
| Mean (SD)                                           | 0.4 (0.9)                 | 0.4 (0.8)                 | 0.5 (0.9)                 | 0.84           |
| No Concern                                          | 87.0%                     | 90.6%                     | 77.1%                     | 0.23           |
| Concern                                             | 13.0%                     | 9.4%                      | 22.9%                     |                |
| <b>BUT B Positive Symptom Distress Index (PSDI)</b> |                           |                           |                           |                |
| Mean (SD)                                           | 2.1 (1.2)                 | 2.3 (1.3)                 | 2.2 (1.2)                 | 0.52           |
| <b>BUT B 1 Mouth</b>                                |                           |                           |                           |                |
| Mean (SD)                                           | 0.8 (1.0)                 | 1.0 (1.1)                 | 0.9 (1.0)                 | 0.58           |
| <b>BUT B 2 Face</b>                                 |                           |                           |                           |                |
| Mean (SD)                                           | 0.6 (0.9)                 | 0.8 (0.9)                 | 0.6 (0.9)                 | 0.48           |
| <b>BUT B 3 Thighs</b>                               |                           |                           |                           |                |



|                          |           |           |           |      |
|--------------------------|-----------|-----------|-----------|------|
| Mean (SD)                | 0.8 (1.2) | 1.0 (1.1) | 0.8 (1.1) | 0.56 |
| <b>BUT B 4 Legs</b>      |           |           |           |      |
| Mean (SD)                | 0.9 (1.1) | 1.2 (1.1) | 1.0 (1.0) | 0.47 |
| <b>BUT B 5 Arms</b>      |           |           |           |      |
| Mean (SD)                | 0.5 (0.9) | 0.8 (0.9) | 0.4 (0.5) | 0.27 |
| <b>BUT B 6 Moustache</b> |           |           |           |      |
| Mean (SD)                | 0.4 (0.9) | 0.6 (0.9) | 0.3 (0.7) | 0.53 |
| <b>BUT B 7 Skin</b>      |           |           |           |      |
| Mean (SD)                | 0.7 (1.2) | 0.9 (1.3) | 0.7 (1.1) | 0.6  |
| <b>BUT B 8 Blushing</b>  |           |           |           |      |
| Mean (SD)                | 0.6 (0.9) | 0.9 (1.1) | 0.6 (0.7) | 0.25 |

Supplemental Table 4: Results of the Berlin questionnaire, Epworth Sleepiness Scale and Pittsburgh Sleep Quality Inventory

| <b>SLEEP QUALITY</b>                             | <b>N=223</b> | <b>Scores</b>          |
|--------------------------------------------------|--------------|------------------------|
| <b>BERLIN QUESTIONNAIRE</b>                      |              |                        |
| Absent or Low risk to develop OSAS               | 40.8%        | normal score $\leq 1$  |
| High Risk to develop OSAS                        | 59.2%        | $>1$                   |
| <b>Epworth Sleepiness Scale</b>                  |              |                        |
| Normal daily sleepiness                          | 80.7%        | normal score $\leq 10$ |
| Mild daily sleepiness                            | 12.9%        | 11-12                  |
| Moderate daily sleepiness                        | 6.4%         | 13-15                  |
| Severe daily sleepiness                          | 0%           | 16-24                  |
| <b>Pittsburgh Sleep Quality Inventory (PSQI)</b> |              |                        |
| No sleep disorders                               | 39.0%        | normal score $\leq 5$  |
| Sleep disorders                                  | 61.0%        | $>5$                   |

| <b>SLEEP QUALITY by age class</b>                | <b>&lt;45 years (N=42)</b> | <b>45-64 years (N=125)</b> | <b>&gt;64 years (N=56)</b> | <b>P-value</b> |
|--------------------------------------------------|----------------------------|----------------------------|----------------------------|----------------|
| <b>BERLIN QUESTIONNAIRE</b>                      |                            |                            |                            |                |
| Absent or Low risk to develop OSAS               | 47.6%                      | 39.2%                      | 39.3%                      | 0.61           |
| High risk to develop OSAS                        | 52.4%                      | 60.8%                      | 60.7%                      |                |
| <b>Epworth Sleepiness Scale</b>                  |                            |                            |                            |                |
| Normal daily sleepiness                          | 81.0%                      | 80.0%                      | 82.1%                      | 0.94           |
| Anormal daily sleepiness                         | 19.0%                      | 20.0%                      | 17.9%                      |                |
| <b>Pittsburgh Sleep Quality Inventory (PSQI)</b> |                            |                            |                            |                |
| No sleep disorders                               | 45.2%                      | 39.2%                      | 33.9%                      | 0.52           |
| Sleep disorders                                  | 54.8%                      | 60.8%                      | 66.1%                      |                |

| <b>SLEEP QUALITY by gender</b>     | <b>Male (N=94)</b> | <b>Female (N=129)</b> | <b>P-value</b> |
|------------------------------------|--------------------|-----------------------|----------------|
| <b>BERLIN QUESTIONNAIRE</b>        |                    |                       |                |
| Absent or Low risk to develop OSAS | 36.2%              | 44.2%                 | 0.29           |
| High risk to develop OSAS          | 63.8%              | 55.8%                 |                |

| <b>Epworth Sleepiness Scale</b>                  |       |       |      |
|--------------------------------------------------|-------|-------|------|
| Normal daily sleepiness                          | 77.7% | 82.9% | 0.41 |
| Anormal daily sleepiness                         | 22.3% | 17.1% |      |
| <b>Pittsburgh Sleep Quality Inventory (PSQI)</b> |       |       |      |
| No sleep disorders                               | 42.6% | 36.4% | 0.43 |
| Sleep disorders                                  | 57.4% | 63.6% |      |

| <b>SLEEP QUALITY by disease duration</b>  | <b>&lt;2 year (N=25)</b> | <b>2-5 year (N=55)</b> | <b>5-10 year (N=59)</b> | <b>&gt;10 year (N=52)</b> | <b>P-value</b> |
|-------------------------------------------|--------------------------|------------------------|-------------------------|---------------------------|----------------|
| <b>BERLIN QUESTIONNAIRE</b>               |                          |                        |                         |                           |                |
| Absent or Low risk to develop OSAS        | 56.0%                    | 32.7%                  | 47.5%                   | 34.6%                     | 0.12           |
| High risk to develop OSAS                 | 44.0%                    | 67.3%                  | 52.5%                   | 65.4%                     |                |
| <b>Epworth Sleepiness Scale</b>           |                          |                        |                         |                           |                |
| Normal daily sleepiness                   | 84.0%                    | 72.7%                  | 83.1%                   | 80.8%                     | 0.5            |
| Abnormal daily sleepiness                 | 16.0%                    | 27.3%                  | 16.9%                   | 19.2%                     |                |
| <b>Pittsburgh Sleep Quality Inventory</b> |                          |                        |                         |                           |                |
| No sleep disorders                        | 48.0%                    | 36.4%                  | 39.0%                   | 42.3%                     | 0.78           |
| Sleep disorders                           | 52.0%                    | 63.6%                  | 61.0%                   | 57.7%                     |                |

| <b>SLEEP QUALITY by disease control</b>          | <b>Disease control (N=156)</b> | <b>No disease control (N=67)</b> | <b>P-value</b> |
|--------------------------------------------------|--------------------------------|----------------------------------|----------------|
| <b>BERLIN QUESTIONNAIRE</b>                      |                                |                                  |                |
| Absent or Low risk to develop OSAS               | 41.0%                          | 40.3%                            | 0.99           |
| High risk to develop OSAS                        | 59.0%                          | 59.7%                            |                |
| <b>Epworth Sleepiness Scale</b>                  |                                |                                  |                |
| Normal daily sleepiness                          | 80.8%                          | 80.6%                            | 0.99           |
| Anormal daily sleepiness                         | 19.2%                          | 19.4%                            |                |
| <b>Pittsburgh Sleep Quality Inventory (PSQI)</b> |                                |                                  |                |
| No sleep disorders                               | 36.5%                          | 44.8%                            | 0.31           |
| Sleep disorders                                  | 63.5%                          | 55.2%                            |                |

| <b>SLEEP QUALITY by IGF-I class</b>              | <b>&lt;=1<br/>(N=156)</b> | <b>1.0-1.3<br/>(N=32)</b> | <b>&gt;1.3<br/>(N=35)</b> | <b>P-value</b> |
|--------------------------------------------------|---------------------------|---------------------------|---------------------------|----------------|
| <b>BERLIN QUESTIONNAIRE</b>                      |                           |                           |                           |                |
| Absent or Low risk to develop OSAS               | 41.0%                     | 34.4%                     | 45.7%                     | 0.64           |
| High risk to develop OSAS                        | 59.0%                     | 65.6%                     | 54.3%                     |                |
| <b>Epworth Sleepiness Scale</b>                  |                           |                           |                           |                |
| Normal daily sleepiness                          | 80.8%                     | 78.1%                     | 82.9%                     | 0.89           |
| Anormal daily sleepiness                         | 19.2%                     | 21.9%                     | 17.1%                     |                |
| <b>Pittsburgh Sleep Quality Inventory (PSQI)</b> |                           |                           |                           |                |
| No sleep disorders                               | 36.5%                     | 40.6%                     | 48.6%                     | 0.41           |
| Sleep disorders                                  | 63.5%                     | 59.4%                     | 51.5%                     |                |

Supplemental Table 5: Evaluation of sexual function in men with the International Index for Erectile Function (A) and women with the Female Sexual Function Index (B)

A

| <b>MEN SEXUAL FUNCTION</b>      | <b>N=94</b> | <b>Score</b>       |
|---------------------------------|-------------|--------------------|
| <b>IIEF total score</b>         |             |                    |
| Mean (SD)                       | 45.6 (23.8) | Score 5-75         |
| <b>Orgasm</b>                   |             |                    |
| Mean (SD)                       | 6.8 (4.5)   | Score 0-10         |
| <b>Desire</b>                   |             |                    |
| Mean (SD)                       | 6.5 (3.5)   | Score 2-10         |
| <b>Intercourse satisfaction</b> |             |                    |
| Mean (SD)                       | 7.5 (4.0)   | Score 0-15         |
| <b>General satisfaction</b>     |             |                    |
| Mean (SD)                       | 6.3 (3.0)   | Score 2-10         |
| Very satisfied                  | 46.2%       | 10                 |
| Moderately Satisfied            | 23 %        | 8                  |
| Unsatisfied                     | 4.4%        | 4                  |
| Very unsatisfied                | 26.4%       | 2                  |
| <b>Erectile Function</b>        |             |                    |
|                                 |             | Score 1-30         |
| Mean (SD)                       | 18.4 (11.1) | Normal score 26-30 |
| No Erectile dysfunction         | 40.4%       |                    |
| Mild Erectile dysfunction       | 22.3%       | 17-25              |
| Moderate Erectile dysfunction   | 12.8%       | 11-16              |
| Severe Erectile dysfunction     | 24.5%       | 6-10               |

| <b>MEN SEXUAL FUNCTION by age class</b> | <b>&lt;45 years<br/>(N=18)</b> | <b>45-64 years<br/>(N=52)</b> | <b>&gt;64 years<br/>(N=24)</b> | <b>P-value</b> |
|-----------------------------------------|--------------------------------|-------------------------------|--------------------------------|----------------|
| <b>IIEF total score</b>                 |                                |                               |                                |                |
| Mean (SD)                               | 52.1 (20.5)                    | 50.5 (20.3)                   | 25.6 (26.3)                    | < 0.001        |
| <b>Erectile Function</b>                |                                |                               |                                |                |
| Mean (SD)                               | 21.6 (9.1)                     | 20.5 (10.1)                   | 9.5 (11.4)                     | < 0.001        |
| <b>Orgasm</b>                           |                                |                               |                                |                |
| Mean (SD)                               | 7.3 (4.0)                      | 7.9 (3.9)                     | 3.3 (4.7)                      | < 0.001        |

|                                 |           |           |           |         |
|---------------------------------|-----------|-----------|-----------|---------|
| <b>Desire</b>                   |           |           |           |         |
| Mean (SD)                       | 7.6 (2.8) | 7.2 (2.9) | 3.5 (3.9) | < 0.001 |
| <b>Intercourse satisfaction</b> |           |           |           |         |
| Mean (SD)                       | 8.4 (4.2) | 8.0 (3.7) | 5.1 (4.1) | 0.012   |
| <b>General satisfaction</b>     |           |           |           |         |
| Mean (SD)                       | 7.2 (2.7) | 6.8 (2.6) | 4.0 (3.3) | < 0.001 |
| <b>Erectile dysfunction</b>     |           |           |           |         |
| No erectile dysfunction         | 61.1%     | 48.1%     | 29.2%     | 0.021   |
| Mild Erectile dysfunction       | 11.1%     | 26.9%     | 8.3%      |         |
| Moderate Erectile dysfunction   | 11.1%     | 15.4%     | 0%        |         |
| Severe Erectile dysfunction     | 16.7%     | 9.6%      | 62.5%     |         |

| <b>MEN SEXUAL FUNCTION by disease duration</b> | <b>&lt;2 year (N=18)</b> | <b>2-5 year (N=17)</b> | <b>5-10 year (N=29)</b> | <b>&gt;10 year (N=30)</b> | <b>P-value</b> |
|------------------------------------------------|--------------------------|------------------------|-------------------------|---------------------------|----------------|
| <b>IIEF total score</b>                        |                          |                        |                         |                           |                |
| Mean (SD)                                      | 34.6 (27.4)              | 49.1 (21.4)            | 48.7 (22.9)             | 45.3 (25.5)               | 0.32           |
| <b>Erectile Function</b>                       |                          |                        |                         |                           |                |
| Mean (SD)                                      | 14.4 (12.5)              | 19.5 (10.4)            | 19.6 (11.6)             | 18.0 (11.3)               | 0.56           |
| <b>Orgasm</b>                                  |                          |                        |                         |                           |                |
| Mean (SD)                                      | 5.00 (5.3)               | 7.8 (3.7)              | 7.1 (4.2)               | 6.9 (5.0)                 | 0.35           |
| <b>Desire</b>                                  |                          |                        |                         |                           |                |
| Mean (SD)                                      | 5.00 (3.8)               | 6.9 (3.26)             | 6.5 (2.8)               | 6.6 (4.4)                 | 0.47           |
| <b>Intercourse satisfaction</b>                |                          |                        |                         |                           |                |
| Mean (SD)                                      | 5.2 (4.2)                | 8.1 (3.4)              | 8.2 (4.1)               | 7.7 (3.9)                 | 0.13           |
| <b>General satisfaction</b>                    |                          |                        |                         |                           |                |
| Mean (SD)                                      | 5.0 (2.8)                | 6.79 (3.0)             | 7.00 (2.8)              | 6.1 (3.2)                 | 0.24           |
| <b>Erectile dysfunction</b>                    |                          |                        |                         |                           |                |
| No erectile dysfunction                        | 44.4%                    | 29.5%                  | 48.3%                   | 40%                       | 0.64           |

|                               |       |       |       |       |
|-------------------------------|-------|-------|-------|-------|
| Mild Erectile dysfunction     | 16.7% | 29.4% | 13.8% | 23.3% |
| Moderate Erectile dysfunction | 11.1% | 23.5% | 13.8% | 6.7%  |
| Severe Erectile dysfunction   | 27.8% | 17.6% | 24.1% | 30%   |

| <b>MEN SEXUAL FUNCTION by disease control</b> | <b>Disease control (N=70)</b> | <b>No disease control (N=24)</b> | <b>P-value</b> |
|-----------------------------------------------|-------------------------------|----------------------------------|----------------|
| <b>IIEF total score</b>                       |                               |                                  |                |
| Mean (SD)                                     | 46.2 (23.5)                   | 43.4 (25.3)                      | 0.65           |
| <b>Erectile Function</b>                      |                               |                                  |                |
| Mean (SD)                                     | 18.9 (10.9)                   | 16.7 (11.8)                      | 0.45           |
| <b>Orgasm</b>                                 |                               |                                  |                |
| Mean (SD)                                     | 6.7 (4.5)                     | 7.2 (4.2)                        | 0.67           |
| <b>Desire</b>                                 |                               |                                  |                |
| Mean (SD)                                     | 6.4 (3.4)                     | 6.8 (3.8)                        | 0.71           |
| <b>Intercourse satisfaction</b>               |                               |                                  |                |
| Mean (SD)                                     | 7.7 (3.7)                     | 6.8 (4.8)                        | 0.41           |
| <b>General satisfaction</b>                   |                               |                                  |                |
| Mean (SD)                                     | 6.4 (2.9)                     | 6.0 (3.4)                        | 0.65           |
| <b>Erectile dysfunction</b>                   |                               |                                  |                |
| No erectile dysfunction                       | 47.2%                         | 12.5%                            | 0.006          |
| Mild Erectile dysfunction                     | 21.4%                         | 16.7%                            |                |
| Moderate Erectile dysfunction                 | 8.6%                          | 16.7%                            |                |
| Severe Erectile dysfunction                   | 22.8%                         | 54.1%                            |                |

| <b>MEN SEXUAL FUNCTION by IGF-I class</b> | <b>&lt;=1<br/>(N=70)</b> | <b>1.0-1.3<br/>(N=12)</b> | <b>&gt;1.3<br/>(N=12)</b> | <b>P-value</b> |
|-------------------------------------------|--------------------------|---------------------------|---------------------------|----------------|
| <b>IIEF total score</b>                   |                          |                           |                           |                |
| Mean (SD)                                 | 46.2 (23.5)              | 46.8 (26.5)               | 38.9 (24.5)               | 0.68           |
| <b>Erectile Function</b>                  |                          |                           |                           |                |
| Mean (SD)                                 | 18.9 (10.9)              | 18.3 (12.5)               | 14.4 (11.1)               | 0.53           |
| <b>Orgasm</b>                             |                          |                           |                           |                |
| Mean (SD)                                 | 6.7 (4.5)                | 7.7 (4.5)                 | 6.4 (3.9)                 | 0.74           |
| <b>Desire</b>                             |                          |                           |                           |                |
| Mean (SD)                                 | 6.4 (3.4)                | 7.7 (4.0)                 | 5.6 (3.3)                 | 0.36           |
| <b>Intercourse satisfaction</b>           |                          |                           |                           |                |
| Mean (SD)                                 | 7.7 (3.7)                | 6.7 (5.1)                 | 6.8 (4.8)                 | 0.63           |
| <b>General satisfaction</b>               |                          |                           |                           |                |
| Mean (SD)                                 | 6.4 (2.9)                | 6.2 (3.3)                 | 5.7 (3.7)                 | 0.81           |
| <b>Erectile dysfunction</b>               |                          |                           |                           |                |
| No erectile dysfunction                   | 47.2%                    | 25%                       | 33.3%                     | 0.12           |
| Mild Erectile dysfunction                 | 21.4%                    | 16.7%                     | 16.7%                     |                |
| Moderate Erectile dysfunction             | 8.6%                     | 8.3%                      | 25%                       |                |
| Severe Erectile dysfunction               | 22.8%                    | 50%                       | 25%                       |                |

B

| <b>WOMEN SEXUAL FUNCTION</b> | <b>N=129</b> | <b>Score</b>              |
|------------------------------|--------------|---------------------------|
| <b>FSFI total score</b>      |              |                           |
| Mean (SD)                    | 15.7 (11.3)  | Normal score $\geq$ 26.55 |
| <b>Desire</b>                |              |                           |
| Mean (SD)                    | 3.0 (1.6)    | score 1.2-6               |
| <b>Arousal</b>               |              |                           |
| Mean (SD)                    | 2.3 (2.0)    | score 0-6                 |
| <b>Lubrication</b>           |              |                           |



|                       |           |             |
|-----------------------|-----------|-------------|
| Mean (SD)             | 2.6 (2.3) | score 0-6   |
| <b>Orgasm</b>         |           |             |
| Mean (SD)             | 2.5 (2.3) | score 0-6   |
| <b>Satisfaction</b>   |           |             |
| Mean (SD)             | 3.0 (1.8) | score 0.8-6 |
| <b>Pain</b>           |           |             |
| Mean (SD)             | 2.7 (2.6) | score 0-6   |
| Sexual dysfunction    | 77.5%     |             |
| No Sexual dysfunction | 22.5%     |             |

| <b>WOMEN SEXUAL FUNCTION by age class</b> | <b>&lt;45 years (N=24)</b> | <b>45-64 years (N=72)</b> | <b>&gt;64 years (N=33)</b> | <b>P-value</b> |
|-------------------------------------------|----------------------------|---------------------------|----------------------------|----------------|
| <b>FSFI total score</b>                   |                            |                           |                            |                |
| Mean (SD)                                 | 20.0 (11.6)                | 17.0 (10.7)               | 8.0 (8.5)                  | < 0.001        |
| <b>Desire</b>                             |                            |                           |                            |                |
| Mean (SD)                                 | 3.4 (1.3)                  | 3.1 (1.6)                 | 2.3 (1.5)                  | 0.034          |
| <b>Arousal</b>                            |                            |                           |                            |                |
| Mean (SD)                                 | 2.9 (1.9)                  | 2.6 (2.0)                 | 1.0 (1.5)                  | < 0.001        |
| <b>Lubrication</b>                        |                            |                           |                            |                |
| Mean (SD)                                 | 3.5 (2.3)                  | 2.9 (2.3)                 | 0.8 (1.2)                  | < 0.001        |
| <b>Orgasm</b>                             |                            |                           |                            |                |
| Mean (SD)                                 | 3.5 (2.3)                  | 2.7 (2.2)                 | 0.8 (1.2)                  | < 0.001        |
| <b>Satisfaction</b>                       |                            |                           |                            |                |
| Mean (SD)                                 | 3.8 (1.7)                  | 3.0 (1.8)                 | 2.1 (1.6)                  | 0.004          |
| <b>Pain</b>                               |                            |                           |                            |                |
| Mean (SD)                                 | 3.5 (2.4)                  | 2.8 (2.5)                 | 1.4 (2.4)                  | 0.012          |
| Sexual dysfunction                        | 60.0%                      | 77.4%                     | 95.8%                      | 0.011          |
| No Sexual dysfunction                     | 40.0%                      | 22.6%                     | 4.2%                       |                |

| <b>WOMEN SEXUAL FUNCTION by disease duration</b> | <b>&lt;2 year (N=28)</b> | <b>2-5 year (N=31)</b> | <b>5-10 year (N=36)</b> | <b>&gt;10 year (N=34)</b> | <b>P-value</b> |
|--------------------------------------------------|--------------------------|------------------------|-------------------------|---------------------------|----------------|
|--------------------------------------------------|--------------------------|------------------------|-------------------------|---------------------------|----------------|

| <b>FSFI total score</b> |            |             |             |             |      |
|-------------------------|------------|-------------|-------------|-------------|------|
| Mean (SD)               | 19.3 (9.8) | 16.4 (10.8) | 15.3 (12.3) | 14.5 (11.0) | 0.69 |
| <b>Desire</b>           |            |             |             |             |      |
| Mean (SD)               | 3.7 (1.4)  | 3.0 (1.7)   | 3.6 (1.8)   | 2.5 (1.2)   | 0.05 |
| <b>Arousal</b>          |            |             |             |             |      |
| Mean (SD)               | 2.5 (1.9)  | 2.0 (1.9)   | 2.8 (2.2)   | 2.0 (1.8)   | 0.45 |
| <b>Lubrication</b>      |            |             |             |             |      |
| Mean (SD)               | 3.0 (2.3)  | 2.6 (2.5)   | 2.7 (2.5)   | 2.2 (2.1)   | 0.76 |
| <b>Orgasm</b>           |            |             |             |             |      |
| Mean (SD)               | 2.8 (2.1)  | 2.6 (2.4)   | 2.3 (2.40)  | 2.1 (2.3)   | 0.83 |
| <b>Satisfaction</b>     |            |             |             |             |      |
| Mean (SD)               | 3.60 (1.3) | 3.2 (1.5)   | 2.9 (2.1)   | 2.9 (2.0)   | 0.7  |
| <b>Pain</b>             |            |             |             |             |      |
| Mean (SD)               | 3.8 (2.7)  | 2.9 (2.6)   | 2.1 (2.4)   | 2.5 (2.6)   | 0.32 |
| Sexual dysfunction      | 80.0%      | 77.8%       | 74.1%       | 85.7%       | 0.75 |
| No Sexual dysfunction   | 20.0%      | 22.2%       | 25.9%       | 14.3%       |      |

| <b>WOMEN SEXUAL FUNCTION by disease control</b> | <b>Disease control (N=91)</b> | <b>No disease control (N=38)</b> | <b>P-value</b> |
|-------------------------------------------------|-------------------------------|----------------------------------|----------------|
| <b>FSFI total score</b>                         |                               |                                  |                |
| Mean (SD)                                       | 15.7 (11.1)                   | 15.8 (11.7)                      | 0.95           |
| <b>Desire</b>                                   |                               |                                  |                |
| Mean (SD)                                       | 3.3 (1.6)                     | 2.5 (1.4)                        | 0.011          |
| <b>Arousal</b>                                  |                               |                                  |                |
| Mean (SD)                                       | 2.4 (2.1)                     | 2.2 (1.8)                        | 0.69           |
| <b>Lubrication</b>                              |                               |                                  |                |
| Mean (SD)                                       | 2.5 (2.3)                     | 2.8 (2.4)                        | 0.75           |
| <b>Orgasm</b>                                   |                               |                                  |                |

|                       |            |           |      |
|-----------------------|------------|-----------|------|
| Mean (SD)             | 2.3 (2.3)  | 2.8 (2.4) | 0.33 |
| <b>Satisfaction</b>   |            |           |      |
| Mean (SD)             | 2.9 (1.78) | 3.2 (1.9) | 0.48 |
| <b>Pain</b>           |            |           |      |
| Mean (SD)             | 2.5 (2.46) | 3.0 (2.6) | 0.3  |
| Sexual dysfunction    | 76.7 %     | 78.9 %    | 0.98 |
| No Sexual dysfunction | 23.3%      | 21.1 %    |      |

| <b>WOMEN SEXUAL FUNCTION by IGF-I class</b> | <b>&lt;=1 (N=91)</b> | <b>1.0-1.3 (N=18)</b> | <b>&gt;1.3 (N=20)</b> | <b>P-value</b> |
|---------------------------------------------|----------------------|-----------------------|-----------------------|----------------|
| <b>FSFI total score</b>                     |                      |                       |                       |                |
| Mean (SD)                                   | 15.7 (11.1)          | 14.2 (12.6)           | 17.3 (10.9)           | 0.7            |
| <b>Desire</b>                               |                      |                       |                       |                |
| Mean (SD)                                   | 3.3 (1.6)            | 2.4 (1.5)             | 2.7 (1.3)             | 0.044          |
| <b>Arousal</b>                              |                      |                       |                       |                |
| Mean (SD)                                   | 2.4 (2.0)            | 1.9 (2.0)             | 2.5 (1.7)             | 0.57           |
| <b>Lubrication</b>                          |                      |                       |                       |                |
| Mean (SD)                                   | 2.5 (2.3)            | 2.2 (2.6)             | 3.0 (2.3)             | 0.54           |
| <b>Orgasm</b>                               |                      |                       |                       |                |
| Mean (SD)                                   | 2.3 (2.3)            | 2.4 (2.7)             | 3.1 (2.1)             | 0.39           |
| <b>Satisfaction</b>                         |                      |                       |                       |                |
| Mean (SD)                                   | 2.9 (1.8)            | 3.0 (2.0)             | 3.3 (1.8)             | 0.68           |
| <b>Pain</b>                                 |                      |                       |                       |                |
| Mean (SD)                                   | 2.5 (2.6)            | 2.6 (2.6)             | 3.4 (2.5)             | 0.30           |
| Sexual dysfunction                          | 76.7 %               | 77.8%                 | 80.0 %                | 0.95           |
| No Sexual dysfunction                       | 23.3 %               | 22.2%                 | 20.0 %                |                |

Supplemental Table 6: Results of Corsi Block Tapping task , Digit Span, Trial Making Test, Phonemic Verb Fluency questionnaires

| <b>Corsi Block Tapping Task (fw)</b>         |             | Score            |
|----------------------------------------------|-------------|------------------|
| Mean (SD)                                    | 4.8 (1.3)   | Normal score >1  |
| Visuospatial working memory troubles         | 9.5 %       |                  |
| No Visuospatial working memory troubles      | 90.5%       |                  |
| <b>Corsi Block Tapping Task (bw)</b>         |             |                  |
| Mean (SD)                                    | 3.8 (1.4)   | Normal score >1  |
| Visuospatial working memory troubles         | 9.5 %       |                  |
| No Visuospatial working memory troubles      | 90.5%       |                  |
| <b>DIGIT SPAN (fw)</b>                       |             |                  |
| Mean (SD)                                    | 6.0 (1.5)   | Normal score >1  |
| Short-term verbal working memory troubles    | 14.5 %      |                  |
| No Short-term verbal working memory troubles | 85.5 %      |                  |
| <b>DIGIT SPAN (bw)</b>                       |             |                  |
| Mean (SD)                                    | 3.9 (1.3)   | Normal score >1  |
| Short-term verbal working memory troubles    | 12.7 %      |                  |
| No Short-term verbal working memory troubles | 87.3 %      |                  |
| <b>Trial Making Test A</b>                   |             |                  |
| Mean (SD)                                    | 33.9 (17.3) |                  |
| Reduced attentive process                    | 12.3%       |                  |
| No Reduced attentive process                 | 87.7%       |                  |
| <b>Trial Making Test B</b>                   |             |                  |
| Mean (SD)                                    | 90.7 (69.5) |                  |
| Reduced attentive process                    | 9.7%        |                  |
| No Reduced attentive process                 | 90.3%       |                  |
| <b>Trial Making Test B-A</b>                 |             |                  |
| Mean (SD)                                    | 57.4 (63.8) |                  |
| Reduced attentive process                    | 9.7%        |                  |
| No Reduced attentive process                 | 90.3%       |                  |
| <b>PHONEMIC VERB FLUENCY</b>                 |             |                  |
| Mean (SD)                                    | 30.7 (9.3)  | Normal score >17 |

|                            |       |
|----------------------------|-------|
| Verbal fluency troubles    | 11.5% |
| No Verbal fluency troubles | 88.5% |

| <b>Cognitive functions by age range</b>      | <b>&lt;45 years<br/>(N=42)</b> | <b>45-64<br/>years<br/>(N=125)</b> | <b>&gt;64 years<br/>(N=56)</b> | <b>P-value</b> |
|----------------------------------------------|--------------------------------|------------------------------------|--------------------------------|----------------|
| <b>Corsi Block Tapping Task (fw)</b>         |                                |                                    |                                |                |
| Mean (SD)                                    | 5.1 (1.6)                      | 4.7 (1.3)                          | 4.7 (1.1)                      | 0.27           |
| Visuospatial working memory troubles         | 7.3%                           | 11.3%                              | 7.1%                           | 0.59           |
| No Visuospatial working memory troubles      | 92.7%                          | 88.7%                              | 92.9%                          |                |
| <b>Corsi Block Tapping Task (bw)</b>         |                                |                                    |                                |                |
| Mean (SD)                                    | 4.0 (1.3)                      | 3.9 (1.5)                          | 3.6 (1.1)                      | 0.23           |
| Visuospatial working memory troubles         | 7.3%                           | 11.3%                              | 7.1%                           | 0.59           |
| No Visuospatial working memory troubles      | 92.7%                          | 88.7%                              | 92.9%                          |                |
| <b>DIGIT SPAN (fw)</b>                       |                                |                                    |                                |                |
| Mean (SD)                                    | 6.2 (1.4)                      | 6.0 (1.6)                          | 5.7 (1.1)                      | 0.29           |
| Short-term verbal working memory troubles    | 12.2%                          | 16.1%                              | 12.5%                          | 0.73           |
| No Short-term verbal working memory troubles | 87.8%                          | 83.9%                              | 87.5%                          |                |
| <b>DIGIT SPAN (bw)</b>                       |                                |                                    |                                |                |
| Mean (SD)                                    | 4.0 (1.1)                      | 4.0 (1.65)                         | 3.9 (1.1)                      | 0.93           |
| Short-term verbal working memory troubles    | 7.3%                           | 15.3%                              | 10.7%                          | 0.36           |
| No Short-term verbal working memory troubles | 92.7 %                         | 84.7%                              | 89.3%                          |                |
| <b>Trial Making Test A</b>                   |                                |                                    |                                |                |
| Mean (SD)                                    | 34.7 (11.3)                    | 32.4 (14.3)                        | 36.7 (25.3)                    | 0.3            |
| Reduced attentive process                    | 9.8%                           | 9.7%                               | 20.0%                          | 0.13           |
| No Reduced attentive process                 | 90.2 %                         | 90.3%                              | 80.0%                          |                |
| <b>Trial Making Test B</b>                   |                                |                                    |                                |                |
| Mean (SD)                                    | 100.0<br>(58.7)                | 82.7 (64.5)                        | 102.0 (86.0)                   | 0.15           |
| Reduced attentive process                    | 7.3%                           | 7.3%                               | 17.3%                          | 0.1            |
| No Reduced attentive process                 | 92.7 %                         | 92.7 %                             | 82.7%                          |                |

| <b>Cognitive functions by age range</b> | <b>&lt;45 years<br/>(N=42)</b> | <b>45-64<br/>years<br/>(N=125)</b> | <b>&gt;64 years<br/>(N=56)</b> | <b>P-value</b> |
|-----------------------------------------|--------------------------------|------------------------------------|--------------------------------|----------------|
| <b>Trial Making Test B-A</b>            |                                |                                    |                                |                |
| Mean (SD)                               | 65.2 (56.4)                    | 51.0 (58.8)                        | 66.2 (78.4)                    | 0.24           |
| Reduced attentive process               | 9.8%                           | 8.1%                               | 13.5%                          | 0.54           |
| No Reduced attentive process            | 90.2 %                         | 91.9%                              | 86.5%                          |                |
| <b>PHONEMIC VERB FLUENCY</b>            |                                |                                    |                                |                |
| Mean (SD)                               | 29.0 (7.7)                     | 32.0 (9.6)                         | 29.1 (9.5)                     | 0.065          |
| Verbal fluency troubles                 | 17.1%                          | 9.0%                               | 12.7%                          | 0.35           |
| No Verbal fluency troubles              | 82.9 %                         | 91.0%                              | 87.3%                          |                |

| <b>Cognitive functions by gender</b>         | <b>Men<br/>(N=94)</b> | <b>Women<br/>(N=129)</b> | <b>P-value</b> |
|----------------------------------------------|-----------------------|--------------------------|----------------|
| <b>Corsi Block Tapping Task (fw)</b>         |                       |                          |                |
| Mean (SD)                                    | 4.8 (1.2)             | 4.8 (1.4)                | 0.9            |
| Visuospatial working memory troubles         | 6.4%                  | 11.7%                    | 0.28           |
| No Visuospatial working memory troubles      | 93.6%                 | 88.3%                    |                |
| <b>Corsi Block Tapping Task (bw)</b>         |                       |                          |                |
| Mean (SD)                                    | 4.1 (1.4)             | 3.6 (1.3)                | 0.028          |
| Visuospatial working memory troubles         | 6.4%                  | 11.7%                    | 0.28           |
| No Visuospatial working memory troubles      | 93.6%                 | 88.3%                    |                |
| <b>DIGIT SPAN (fw)</b>                       |                       |                          |                |
| Mean (SD)                                    | 6.2 (1.7)             | 5.8 (1.3)                | 0.14           |
| Short-term verbal working memory troubles    | 19.4%                 | 10.9%                    | 0.12           |
| No Short-term verbal working memory troubles | 80.6%                 | 89.1%                    |                |
| <b>DIGIT SPAN (bw)</b>                       |                       |                          |                |
| Mean (SD)                                    | 4.2 (1.4)             | 3.8 (1.2)                | 0.051          |
| Short-term verbal working memory troubles    | 10.8%                 | 14.1%                    | 0.6            |
| No Short-term verbal working memory troubles | 89.2%                 | 85.9%                    |                |

| <b>Cognitive functions by gender</b> | <b>Men<br/>(N=94)</b> | <b>Women<br/>(N=129)</b> | <b>P-value</b> |
|--------------------------------------|-----------------------|--------------------------|----------------|
| <b>Trial Making Test A</b>           |                       |                          |                |
| Mean (SD)                            | 31.9 (17.6)           | 35.4 (17.0)              | 0.14           |
| Reduced attentive process            | 7.5%                  | 15.7%                    | 0.1            |
| No Reduced attentive process         | 92.5%                 | 84.3%                    |                |
| <b>Trial Making Test B</b>           |                       |                          |                |
| Mean (SD)                            | 80.3 (60.8)           | 98.5 (74.7)              | 0.05           |
| Reduced attentive process            | 5.4%                  | 12.9%                    | 0.1            |
| No Reduced attentive process         | 94.6%                 | 87.1%                    |                |
| <b>Trial Making Test B-A</b>         |                       |                          |                |
| Mean (SD)                            | 49.1 (54.0)           | 63.5 (69.8)              | 0.089          |
| Reduced attentive process            | 6.4%                  | 12.1%                    | 0.25           |
| No Reduced attentive process         | 93.6%                 | 87.9%                    |                |
| <b>PHONEMIC VERB FLUENCY</b>         |                       |                          |                |
| Mean (SD)                            | 29.6 (8.9)            | 31.5 (9.6)               | 0.14           |
| Verbal fluency troubles              | 12.1%                 | 11.0%                    | 0.98           |
| No Verbal fluency troubles           | 87.9%                 | 89.0%                    |                |

| <b>Cognitive functions by disease duration</b> | <b>&lt;2 year<br/>(N=25)</b> | <b>2-5 year<br/>(N=55)</b> | <b>5-10 year<br/>(N=59)</b> | <b>&gt;10 year<br/>(N=52)</b> | <b>P-value</b> |
|------------------------------------------------|------------------------------|----------------------------|-----------------------------|-------------------------------|----------------|
| <b>Corsi Block Tapping Task (fw)</b>           |                              |                            |                             |                               |                |
| Mean (SD)                                      | 5.0 (0.9)                    | 5.0 (1.4)                  | 4.5 (1.3)                   | 4.8 (1.3)                     | 0.19           |
| Visuospatial working memory troubles           | 0.0%                         | 9.1%                       | 14.0 %                      | 7.7 %                         | 0.23           |
| No Visuospatial working memory troubles        | 100.0%                       | 90.9%                      | 86.0 %                      | 92.3%                         |                |
| <b>Corsi Block Tapping Task (bw)</b>           |                              |                            |                             |                               |                |
| Mean (SD)                                      | 4.3 (1.6)                    | 4.0 (1.42)                 | 3.7 (1.5)                   | 3.7 (1.3)                     | 0.17           |
| Visuospatial working memory troubles           | 0.0%                         | 9.1%                       | 14.0 %                      | 7.7 %                         | 0.23           |
| No Visuospatial working memory troubles        | 100.0%                       | 90.9%                      | 86.0 %                      | 92.3%                         |                |
| <b>DIGIT SPAN (fw)</b>                         |                              |                            |                             |                               |                |

| <b>Cognitive functions by disease duration</b> | <b>&lt;2 year (N=25)</b> | <b>2-5 year (N=55)</b> | <b>5-10 year (N=59)</b> | <b>&gt;10 year (N=52)</b> | <b>P-value</b> |
|------------------------------------------------|--------------------------|------------------------|-------------------------|---------------------------|----------------|
| Mean (SD)                                      | 6.2 (1.4)                | 6.0 (1.3)              | 6.0 (1.4)               | 5.9 (1.6)                 | 0.382          |
| Short-term verbal working memory troubles      | 12.0%                    | 12.7 %                 | 12.3 %                  | 17.3 %                    | 0.86           |
| No Short-term verbal working memory troubles   | 88.0%                    | 87.3 %                 | 87.7 %                  | 82.7 %                    |                |
| <b>DIGIT SPAN (bw)</b>                         |                          |                        |                         |                           |                |
| Mean (SD)                                      | 4.3 (1.5)                | 4.0 (1.0)              | 4.0 (1.2)               | 4.0 (1.5)                 | 0.6            |
| Short-term verbal working memory troubles      | 8.0%                     | 9.1 %                  | 8.8 %                   | 13.5 %                    | 0.81           |
| No Short-term verbal working memory troubles   | 92.0%                    | 90.9 %                 | 91.2 %                  | 86.5 %                    |                |
| <b>Trial Making Test A</b>                     |                          |                        |                         |                           |                |
| Mean (SD)                                      | 33.4 (11.0)              | 36.1 (15.0)            | 34.2 (23.6)             | 32.2 (14.7)               | 0.72           |
| Reduced attentive process                      | 4.0%                     | 14.8 %                 | 15.8 %                  | 11.5 %                    | 0.48           |
| No Reduced attentive process                   | 96.0%                    | 85.2 %                 | 84.2 %                  | 88.5 %                    |                |
| <b>Trial Making Test B</b>                     |                          |                        |                         |                           |                |
| Mean (SD)                                      | 81.5 (28.9)              | 88.4 (49.6)            | 90.8 (77.5)             | 91.2 (79.0)               | 0.94           |
| Reduced attentive process                      | 0.0%                     | 5.6 %                  | 16.1%                   | 13.7 %                    | 0.34           |
| No Reduced attentive process                   | 100.0%                   | 94.4 %                 | 83.9 %                  | 86.3 %                    |                |
| <b>Trial Making Test B-A</b>                   |                          |                        |                         |                           |                |
| Mean (SD)                                      | 47.6 (24.7)              | 52.8 (46.4)            | 57.6 (68.5)             | 60.4 (76.5)               | 0.83           |
| Reduced attentive process                      | 4.2%                     | 5.6 %                  | 12.5%                   | 13.7 %                    | 0.34           |
| No Reduced attentive process                   | 95.8 %                   | 94.4 %                 | 87.5 %                  | 86.3 %                    |                |
| <b>PHONEMIC VERB FLUENCY</b>                   |                          |                        |                         |                           |                |
| Mean (SD)                                      | 32.0 (6.9)               | 30.5 (8.3)             | 32 (10.6)               | 30.3 (9.7)                | 0.74           |



| <b>Cognitive functions by disease duration</b> | <b>&lt;2 year (N=25)</b> | <b>2-5 year (N=55)</b> | <b>5-10 year (N=59)</b> | <b>&gt;10 year (N=52)</b> | <b>P-value</b> |
|------------------------------------------------|--------------------------|------------------------|-------------------------|---------------------------|----------------|
| Verbal fluency troubles                        | 4.0 %                    | 7.3 %                  | 10.7%                   | 16.0%                     | 0.33           |
| No Verbal fluency troubles                     | 96.0 %                   | 92.7 %                 | 89.3%                   | 84.0%                     |                |

| <b>Cognitive functions disease control</b>   | <b>Disease control (N=156)</b> | <b>No disease control (N=67)</b> | <b>P-value</b> |
|----------------------------------------------|--------------------------------|----------------------------------|----------------|
| <b>Corsi Block Tapping Task (fw)</b>         |                                |                                  |                |
| Mean (SD)                                    | 4.8 (1.3)                      | 4.8 (1.2)                        | 0.85           |
| Visuospatial working memory troubles         | 10.4%                          | 7.5%                             | 0.76           |
| No Visuospatial working memory troubles      | 89.6%                          | 92.5%                            | 0.67           |
| <b>Corsi Block Tapping Task (bw)</b>         |                                |                                  |                |
| Mean (SD)                                    | 3.7 (1.3)                      | 4.1 (1.6)                        | 0.095          |
| Visuospatial working memory troubles         | 10.4%                          | 7.5%                             | 0.67           |
| No Visuospatial working memory troubles      | 89.6%                          | 92.5%                            | 0.67           |
| <b>DIGIT SPAN (fw)</b>                       |                                |                                  |                |
| Mean (SD)                                    | 5.9 (1.5)                      | 6.1 (1.4)                        | 0.34           |
| Short-term verbal working memory troubles    | 15.6%                          | 11.9%                            | 0.62           |
| No Short-term verbal working memory troubles | 84.4%                          | 88.1%                            | 0.62           |
| <b>DIGIT SPAN (bw)</b>                       |                                |                                  |                |
| Mean (SD)                                    | 3.9 (1.3)                      | 4.0 (1.4)                        | 0.76           |
| Short-term verbal working memory troubles    | 12.3%                          | 13.4%                            | 0.99           |
| No Short-term verbal working memory troubles | 87.7%                          | 86.6%                            | 0.99           |
| <b>Trial Making Test A</b>                   |                                |                                  |                |
| Mean (SD)                                    | 34.1 (17.3)                    | 33.5 (17.5)                      | 0.81           |
| Reduced attentive process                    | 11.8%                          | 13.4%                            | 0.9            |
| No Reduced attentive process                 | 88.2%                          | 86.6%                            | 0.9            |

| <b>Cognitive functions disease control</b> | <b>Disease control (N=156)</b> | <b>No disease control (N=67)</b> | <b>P-value</b> |
|--------------------------------------------|--------------------------------|----------------------------------|----------------|
| <b>Trial Making Test B</b>                 |                                |                                  |                |
| Mean (SD)                                  | 87.9 (67.8)                    | 97.2 (73.4)                      | 0.38           |
| Reduced attentive process                  | 9.3%                           | 10.6%                            | 0.96           |
| No Reduced attentive process               | 90.7%                          | 89.4%                            |                |
| <b>Trial Making Test B-A</b>               |                                |                                  |                |
| Mean (SD)                                  | 54.3 (63.0)                    | 64.2 (65.3)                      | 0.3            |
| Reduced attentive process                  | 8.6%                           | 12.1%                            | 0.58           |
| No Reduced attentive process               | 91.4%                          | 87.9%                            |                |
| <b>PHONEMIC VERB FLUENCY</b>               |                                |                                  |                |
| Mean (SD)                                  | 30.4 (9.4)                     | 31.3 (9.2)                       | 0.51           |
| Verbal fluency troubles                    | 11.7%                          | 10.9%                            | 0.99           |
| No Verbal fluency troubles                 | 88.3%                          | 89.1%                            |                |

| <b>Cognitive functions by IGF-I categories</b> | <b>&lt;=1 (N=156)</b> | <b>1.0-1.3 (N=32)</b> | <b>&gt;1.3 (N=35)</b> | <b>P-value</b> |
|------------------------------------------------|-----------------------|-----------------------|-----------------------|----------------|
| <b>Corsi Block Tapping Task (fw)</b>           |                       |                       |                       |                |
| Mean (SD)                                      | 4.8 (1.3)             | 4.8 (1.3)             | 4.8 (1.1)             | 0.98           |
| Visuospatial working memory troubles           | 10.4%                 | 6.2%                  | 8.6%                  | 0.75           |
| No Visuospatial working memory troubles        | 89.6%                 | 93.8%                 | 91.4%                 |                |
| <b>Corsi Block Tapping Task (bw)</b>           |                       |                       |                       |                |
| Mean (SD)                                      | 3.7 (1.3)             | 3.9 (1.7)             | 4.3 (1.6)             | 0.09           |
| Visuospatial working memory troubles           | 10.4%                 | 6.2%                  | 8.6%                  | 0.75           |
| No Visuospatial working memory troubles        | 89.6%                 | 93.8%                 | 91.4%                 |                |
| <b>DIGIT SPAN (fw)</b>                         |                       |                       |                       |                |
| Mean (SD)                                      | 5.9 (1.5)             | 6.2 (1.6)             | 6.1 (1.2)             | 0.62           |
| Short-term verbal working memory troubles      | 15.6%                 | 12.5%                 | 11.4%                 | 0.77           |
| No Short-term verbal working memory troubles   | 84.4%                 | 87.5%                 | 88.6%                 |                |
| <b>DIGIT SPAN (bw)</b>                         |                       |                       |                       |                |
| Mean (SD)                                      | 3.9 (1.3)             | 3.7 (1.5)             | 4.3 (1.2)             | 0.2            |

| <b>Cognitive functions by IGF-I categories</b> | <b>&lt;=1<br/>(N=156)</b> | <b>1.0-1.3<br/>(N=32)</b> | <b>&gt;1.3<br/>(N=35)</b> | <b>P-value</b> |
|------------------------------------------------|---------------------------|---------------------------|---------------------------|----------------|
| Short-term verbal working memory troubles      | 12.3%                     | 21.9%                     | 5.7%                      | 0.14           |
| No Short-term verbal working memory troubles   | 87.7%                     | 78.1%                     | 94.3%                     |                |
| <b>Trial Making Test A</b>                     |                           |                           |                           |                |
| Mean (SD)                                      | 34.1 (17.3)               | 35.2 (18.8)               | 32.0 (16.4)               | 0.73           |
| Reduced attentive process                      | 11.8%                     | 15.6%                     | 11.4%                     | 0.82           |
| No Reduced attentive process                   | 88.2%                     | 84.4%                     | 88.6%                     |                |
| <b>Trial Making Test B</b>                     |                           |                           |                           |                |
| Mean (SD)                                      | 87.9 (67.8)               | 85.2 (42.5)               | 108 (91.8)                | 0.26           |
| Reduced attentive process                      | 9.3%                      | 6.2%                      | 14.7%                     | 0.49           |
| No Reduced attentive process                   | 90.7%                     | 93.8%                     | 85.3%                     |                |
| <b>Trial Making Test B-A</b>                   |                           |                           |                           |                |
| Mean (SD)                                      | 54.3 (63.0)               | 49.5 (39.3)               | 78.1 (81.0)               | 0.11           |
| Reduced attentive process                      | 8.6%                      | 6.2%                      | 17.6%                     | 0.21           |
| No Reduced attentive process                   | 91.4%                     | 93.8%                     | 82.4%                     |                |
| <b>PHONEMIC VERB FLUENCY</b>                   |                           |                           |                           |                |
| Mean (SD)                                      | 30.4 (9.4)                | 30.7 (7.6)                | 32.0 (10.6)               | 0.69           |
| Verbal fluency troubles                        | 11.7%                     | 6.2%                      | 15.6%                     | 0.49           |
| No Verbal fluency troubles                     | 88.3%                     | 93.8%                     | 84.4%                     |                |

Supplemental Table 7: Results of the AcroQoL

---



---

|                                    |             |
|------------------------------------|-------------|
| <b>ACROQoL</b>                     |             |
| <b>Total score</b>                 |             |
| Mean (SD)                          | 62.4 (20.4) |
| <b>Physical Quality</b>            |             |
| Mean (SD)                          | 56.5 (25.3) |
| <b>Psychological Quality</b>       |             |
| Mean (SD)                          | 64.5 (19.7) |
| <b>Body Image Quality</b>          |             |
| Mean (SD)                          | 54.3 (24.0) |
| <b>Social Relationship Quality</b> |             |
| Mean (SD)                          | 75.1 (19.3) |

---



---



---



---

| <b>ACROQoL by age class</b>        | <b>&lt;45 years<br/>(N=42)</b> | <b>45-64 years<br/>(N=125)</b> | <b>&gt;64 years<br/>(N=56)</b> | <b>P-value</b> |
|------------------------------------|--------------------------------|--------------------------------|--------------------------------|----------------|
| <b>Total score</b>                 |                                |                                |                                |                |
| Mean (SD)                          | 61.9 (19.3)                    | 61.7 (21.4)                    | 64.6 (18.9)                    | 0.69           |
| <b>Physical Quality</b>            |                                |                                |                                |                |
| Mean (SD)                          | 55.8 (22.9)                    | 57.0 (25.9)                    | 55.9 (26.1)                    | 0.95           |
| <b>Psychological Quality</b>       |                                |                                |                                |                |
| Mean (SD)                          | 62.8 (18.5)                    | 63.3 (21.0)                    | 68.6 (17.2)                    | 0.23           |
| <b>Body Image Quality</b>          |                                |                                |                                |                |
| Mean (SD)                          | 53.6 (21.1)                    | 53.6 (25.0)                    | 56.4 (24.1)                    | 0.77           |
| <b>Social Relationship Quality</b> |                                |                                |                                |                |
| Mean (SD)                          | 72.0 (19.3)                    | 73.8 (20.6)                    | 80.8 (15.1)                    | 0.05           |

---



---



---



---

| <b>ACROQoL by gender</b> | <b>Male<br/>(N=94)</b> | <b>Female<br/>(N=129)</b> | <b>P-value</b> |
|--------------------------|------------------------|---------------------------|----------------|
| <b>Total score</b>       |                        |                           |                |
| Mean (SD)                | 64.1 (21.8)            | 61.2 (19.2)               | 0.31           |

---



---

|                                    |             |             |      |
|------------------------------------|-------------|-------------|------|
| <b>Physical Quality</b>            |             |             |      |
| Mean (SD)                          | 58.5 (27.1) | 55.0 (23.8) | 0.33 |
| <b>Psychological Quality</b>       |             |             |      |
| Mean (SD)                          | 66.0 (20.9) | 63.3 (18.8) | 0.33 |
| <b>Body Image Quality</b>          |             |             |      |
| Mean (SD)                          | 56.5 (25.2) | 52.6 (23.1) | 0.25 |
| <b>Social Relationship Quality</b> |             |             |      |
| Mean (SD)                          | 76.3 (19.9) | 74.2 (18.9) | 0.43 |

| <b>ACROQoL by disease duration</b> | <b>&lt;2 year<br/>(N=25)</b> | <b>2-5 year<br/>(N=55)</b> | <b>5-10 year<br/>(N=59)</b> | <b>10+ year<br/>(N=52)</b> | <b>P-value</b> |
|------------------------------------|------------------------------|----------------------------|-----------------------------|----------------------------|----------------|
| <b>Total score</b>                 |                              |                            |                             |                            |                |
| Mean (SD)                          | 60.6 (24.9)                  | 60.1 (19.2)                | 64.4 (19.1)                 | 62.4 (21.1)                | 0.72           |
| <b>Physical Quality</b>            |                              |                            |                             |                            |                |
| Mean (SD)                          | 53.6 (26.9)                  | 54.3 (25.0)                | 59.6 (25.7)                 | 56.7 (24.7)                | 0.67           |
| <b>Psychological Quality</b>       |                              |                            |                             |                            |                |
| Mean (SD)                          | 60.8 (24.0)                  | 63.1 (17.7)                | 65.5 (17.8)                 | 64.6 (21.7)                | 0.79           |
| <b>Body Image Quality</b>          |                              |                            |                             |                            |                |
| Mean (SD)                          | 52.9 (28.0)                  | 51.1 (22.4)                | 55.6 (22.3)                 | 54.0 (25.9)                | 0.81           |
| <b>Social Relationship Quality</b> |                              |                            |                             |                            |                |
| Mean (SD)                          | 68.9 (22.8)                  | 75.5 (16.5)                | 76.3 (18.6)                 | 75.5 (21.9)                | 0.43           |

| <b>ACROQoL by disease control</b> | <b>Disease control<br/>(N=156)</b> | <b>No disease control<br/>(N=67)</b> | <b>P-value</b> |
|-----------------------------------|------------------------------------|--------------------------------------|----------------|
| <b>Total score</b>                |                                    |                                      |                |
| Mean (SD)                         | 62.7 (20.2)                        | 61.9 (20.9)                          | 0.81           |
| <b>Physical Quality</b>           |                                    |                                      |                |
| Mean (SD)                         | 57.1 (25.0)                        | 55.3 (26.1)                          | 0.65           |
| <b>Psychological Quality</b>      |                                    |                                      |                |
| Mean (SD)                         | 65.0 (19.7)                        | 63.2 (19.9)                          | 0.53           |

---

---

|                                    |             |             |      |
|------------------------------------|-------------|-------------|------|
| <b>Body Image Quality</b>          |             |             |      |
| Mean (SD)                          | 55.1 (23.8) | 52.5 (24.6) | 0.48 |
| <b>Social Relationship Quality</b> |             |             |      |
| Mean (SD)                          | 75.2 (19.3) | 74.9 (19.4) | 0.93 |

---

---

| <b>ACROQoL by IGF-I class</b>      | <b>&lt;=1<br/>(N=156)</b> | <b>1.0-1.3<br/>(N=32)</b> | <b>&gt;1.3<br/>(N=35)</b> | <b>P-value</b> |
|------------------------------------|---------------------------|---------------------------|---------------------------|----------------|
| <b>Total score</b>                 |                           |                           |                           |                |
| Mean (SD)                          | 62.7 (20.2)               | 59.6 (21.1)               | 66.3 (20.1)               | 0.18           |
| <b>Physical Quality</b>            |                           |                           |                           |                |
| Mean (SD)                          | 57.1 (25.0)               | 48.6 (25.94)              | 61.3 (25.6)               | 0.12           |
| <b>Psychological Quality</b>       |                           |                           |                           |                |
| Mean (SD)                          | 65.0 (19.7)               | 57.7 (20.3)               | 68.0 (18.6)               | 0.091          |
| <b>Body Image Quality</b>          |                           |                           |                           |                |
| Mean (SD)                          | 55.1 (23.8)               | 44.7 (23.6)               | 59.3 (23.7)               | 0.039          |
| <b>Social Relationship Quality</b> |                           |                           |                           |                |
| Mean (SD)                          | 75.2 (19.3)               | 70.7 (20.9)               | 78.6 (17.6)               | 0.27           |
